# Supplementary material
Source: publisher site journal article supplement (https://www.dovepress.com/article/600837)
Supplement: Supplementary file 1 [file 600837%20Revised%20Appendix.docx]

**Discounting Practices in Cost-Effectiveness Analyses in Dentistry: A Systematic Review of Studies Published After 2020**

Table S1 Study Characteristics

Table S2 CHEERS 2022 Evaluation

Y - Yes; P - Partially; NA - Not Applicable; N – No

Table S3 PubMed Search Strategy

| **#** | **Search** | **Results** |
| --- | --- | --- |
| 1 | Costs and Cost Analysis[mesh] | 274019 |
| 2 | “economic evaluation”[tiab] | 15259 |
| 3 | "cost effectiveness analysis"[tiab] | 15204 |
| 4 | "cost benefit analysis"[tiab] | 3808 |
| 5 | "cost utility analysis"[tiab] | 98783 |
| 6* | 1 OR 2 OR 3 OR 4 OR 5 | 284740 |
| 7 | Dentistry[mesh] | 445725 |
| 8 | dent*[tiab] | 445600 |
| 9 | mandib*[tiab] | 112256 |
| 10 | “jaw”[tiab] | 37216 |
| 11 | “oral health”[tiab] | 39378 |
| 12* | 7 OR 8 OR 9 OR 10 OR 11 | 770940 |
| 13* | 6 AND 12 AND (2020:2024[pdat]) | 485 |

* Preceding search criteria are combined.

Table S4 Web of Science Search Strategy

| **#** | **Search** | **Results** |
| --- | --- | --- |
| 1 | TS=(economic evaluation) | 108705 |
| 2 | AB=(“economic evaluation”) | 12877 |
| 3 | AB=(”cost effectiveness analysis”) | 8241 |
| 4 | AB=(”cost benefit analysis”) | 9939 |
| 5 | AB=(”cost utility analysis”) | 2310 |
| 6* | 1 OR 2 OR 3 OR 4 OR 5 | 124941 |
| 7 | TS=(Dentistry) | 43715 |
| 8 | AB=(dent*) | 288105 |
| 9 | AB=(mandib*) | 81679 |
| 10 | AB=("jaw") | 30422 |
| 11 | AB=("oral health") | 26872 |
| 12* | 7 OR 8 OR 9 OR 10 OR 11 | 381438 |
| 13* | 6 AND 12 AND Publication Date 2020-01-01 – 2024-12-31 | 271 |

* Preceding search criteria are combined.

Table S5 CENTRAL Search Strategy

| **#** | **Search** | **Results** |
| --- | --- | --- |
| 1 | MeSH descriptor: [Health Care Economics and Organizations] explode all trees | 38200 |
| 2 | ("economic evaluation"):ti,ab,kw | 5406 |
| 3 | ("cost effectiveness analysis"):ti,ab,kw | 15027 |
| 4 | ("cost benefit analysis"):ti,ab,kw | 13952 |
| 5 | ("cost utility analysis"):ti,ab,kw | 2196 |
| 6* | 1 OR 2 OR 3 OR 4 OR 5 | 51906 |
| 7 | MeSH descriptor: [Dentistry] explode all trees | 25343 |
| 8 | (dent*):ti,ab,kw | 47265 |
| 9 | (mandib*):ti,ab,kw | 11776 |
| 10 | ("jaw"):ti,ab,kw | 5291 |
| 11 | ("oral health"):ti,ab,kw | 5658 |
| 12* | 7 OR 8 OR 9 OR 10 OR 11 | 60400 |
| 13* | 6 AND 12 with Cochrane Library publication date from Jan 2020 to Dec 2024 | 242 |

* Preceding search criteria are combined.

Table S6 PROSPERO Search Strategy

| **#** | **Search** | **Results** |
| --- | --- | --- |
| 1 | economic evaluation WHERE CD FROM 01/01-2020 TO 04/11/2024 | 1741 |
| 2 | cost effectiveness analysis WHERE CD FROM 01/01-2020 TO 04/11/2024 | 877 |
| 3 | cost benefit analysis WHERE CD FROM 01/01-2020 TO 04/11/2024 | 521 |
| 4 | cost utility analysis WHERE CD FROM 01/01-2020 TO 04/11/2024 | 424 |
| 5* | 1 OR 2 OR 3 OR 4 OR 5 | 2155 |
| 6 | dentistry | 6665 |
| 7 | dent* | 17566 |
| 8 | mand* | 4973 |
| 9 | jaw | 1156 |
| 10 | oral health | 9674 |
| 11* | 6 OR 7 OR 8 OR 9 OR 10 | 21585 |
| 12* | 5 AND 11 | 160 |

* Preceding search criteria are combined.

Table S7 Embase Search Strategy

| **#** | **Search** | **Results** |
| --- | --- | --- |
| 1 | 'economic evaluation'/exp | 375355 |
| 2 | 'cost effectiveness analysis':ti,ab | 20563 |
| 3 | 'cost utility analysis':ti,ab | 5254 |
| 4 | 'cost benefit analysis':ti,ab | 6110 |
| 5* | 1 OR 2 OR 3 OR 4 | 377590 |
| 6 | 'dentistry'/exp | 148485 |
| 7 | dent*:ti,ab | 454837 |
| 8 | mandib*:ti,ab | 119127 |
| 9 | 'jaw':ti,ab | 43198 |
| 10 | 'oral health':ti,ab | 38962 |
| 11* | 6 OR 7 OR 8 OR 9 OR 10 | 657115 |
| 12* | 5 AND 11 AND [2020-2024]/py | 619 |

* Preceding search criteria are combined.

Table S8 EconLit Search Strategy

| **#** | **Search** | **Results** |
| --- | --- | --- |
| 1 | economic evaluation | 3373 |
| 2 | economic analysis | 112821 |
| 3 | cost-effectiveness | 3402 |
| 4 | cost-benefit | 10391 |
| 5 | cost-utility | 270 |
| 6 | cost-consequence | 45 |
| 7* | 1 OR 2 OR 3 OR 4 OR 5 OR 6 | 126782 |
| 8 | dentistry | 137 |
| 9 | dent* | 1444 |
| 10 | mand* | 13713 |
| 11 | jaw | 63 |
| 12 | oral health | 50 |
| 13* | 8 or 9 or 10 or 11 or 12 | 15237 |
| 14* | 7 AND 13 AND Limiters - Publication Date: 20200101-20241231 | 273 |

* Preceding search criteria are combined.

Table S9 SCOPUS Search Strategy

| **#** | **Search** | **Results** |
| --- | --- | --- |
| 1 | SUBJAREA ( econ ) | 1638821 |
| 2 | TITLE-ABS ( "economic evaluation" ) | 31436 |
| 3 | TITLE-ABS ( "cost effectiveness analysis" ) | 18673 |
| 4 | TITLE-ABS ( "cost benefit analysis" ) | 21214 |
| 5 | TITLE-ABS ( "cost utility analysis" ) | 4555 |
| 6* | 1 OR 2 OR 3 OR 4 OR 5 | 1705245 |
| 7 | SUBJAREA ( dent ) | 579384 |
| 8 | TITLE-ABS ( "dentistry" ) | 69183 |
| 9 | TITLE-ABS ( "oral health" ) | 43218 |
| 10 | TITLE-ABS ( dent* ) | 556683 |
| 11 | TITLE-ABS ( mandib* ) | 137671 |
| 12 | TITLE-ABS ( "jaw" ) | 65005 |
| 13* | 7 OR 8 OR 9 OR 10 OR 11 OR 12 | 1026183 |
| 14* | 6 AND 13 AND PUBYEAR > 2019 | 514 |

* Preceding search criteria are combined.

Table S10 CEA Registry Search Strategy

| **#** | **Search** | **Results** |
| --- | --- | --- |
| 1 | keyword:”oral health” | 4 |
| 2 | keyword:”dentistry” | 1 |
| 3 | keyword:”jaw”: | 0 |
| 4 | keyword:dent* | 10 |
| 5 | keyword:mandib* | 2 |

Filter: From 2020
